# Supplementary material
Source: MDPI journal article supplement (https://www.mdpi.com/2073-445X/12/8/1567)
Supplement: s1 [file s1]

Archive with 6 entries (6 files):
- Table S1_Soil diversity (pedodiversity).pdf
- Table S2_overview of the accounting framework.pdf
- Table S3_Area-normalized content.pdf
- Table S4_Distribution of soil carbon regulating ecosystem services in the state of Illinois (USA) by soil order_rev.pdf
- Table S5_Increases in developed land and potential for realized social costs of carbon (C) in the state of Illinois.pdf
- Table S6_Developed land and potential for realized social costs of carbon (C)_IL.pdf
