# Supplementary material
Source: MDPI journal article supplement (https://www.mdpi.com/2073-445X/12/8/1567)
Supplement: s1 [file s1]

**Table S3.** Area-normalized content ( $\text{kg m}^{-2}$ ) and monetary values ( $\$ \text{m}^{-2}$ ) of soil organic carbon (SOC), soil inorganic carbon (SIC), and total soil carbon (TSC = SOC + SIC) by soil order using data developed by Guo et al. (2006) [20] for the upper 2-m of soil and an avoided social cost of carbon (SC- $\text{CO}_2$ ) of \$46 per metric ton of  $\text{CO}_2$ , applicable for 2025 (2007 U.S. dollars with an average discount rate of 3% [19]).

| Soil Order  | SOC Content ( $\text{kg m}^{-2}$ )<br>SOC Value ( $\$ \text{m}^{-2}$ ) | SIC Content ( $\text{kg m}^{-2}$ )<br>SIC Value ( $\$ \text{m}^{-2}$ ) | TSC Content ( $\text{kg m}^{-2}$ )<br>TSC Value ( $\$ \text{m}^{-2}$ ) |
|-------------|------------------------------------------------------------------------|------------------------------------------------------------------------|------------------------------------------------------------------------|
|             | Minimum—Midpoint—Maximum Values                                        |                                                                        |                                                                        |
| Entisols    | 1.8–8.0–15.8                                                           | 1.9–4.8–8.4                                                            | 3.7–12.8–24.2                                                          |
|             | 0.30–1.35–2.66                                                         | 0.32–0.82–1.42                                                         | 0.62–2.17–4.08                                                         |
| Inceptisols | 2.8–8.9–17.4                                                           | 2.5–5.1–8.4                                                            | 5.3–14.0–25.8                                                          |
|             | 0.47–1.50–2.93                                                         | 0.42–0.86–1.42                                                         | 0.89–2.36–4.35                                                         |
| Histosols   | 63.9–140.1–243.9                                                       | 0.6–2.4–5.0                                                            | 64.5–142.5–248.9                                                       |
|             | 10.78–23.62–41.14                                                      | 0.10–0.41–0.84                                                         | 10.88–24.03–41.98                                                      |
| Alfisols    | 2.3–7.5–14.1                                                           | 1.3–4.3–8.1                                                            | 3.6–11.8–22.2                                                          |
|             | 0.39–1.27–2.38                                                         | 0.22–0.72–1.37                                                         | 0.61–1.99–3.74                                                         |
| Mollisols   | 5.9–13.5–22.8                                                          | 4.9–11.5–19.7                                                          | 10.8–25.0–42.5                                                         |
|             | 1.00–2.28–3.85                                                         | 0.83–1.93–3.32                                                         | 1.82–4.21–7.17                                                         |
| Ultisols    | 1.9–7.1–13.9                                                           | 0.0–0.0–0.0                                                            | 1.9–7.1–13.9                                                           |
|             | 0.32–1.20–2.34                                                         | 0.00–0.00–0.00                                                         | 0.32–1.20–2.34                                                         |

Note: Entisols, Inceptisols, Alfisols, Mollisols, and Ultisols are mineral soils. Histosols are mostly organic soils.
