# Supplementary material
Source: MDPI journal article supplement (https://www.mdpi.com/2073-445X/12/8/1567)
Supplement: s1 [file s1 › Table S1_Soil diversity (pedodiversity).pdf]

**Table S1.** Soil diversity (pedodiversity) is expressed as taxonomic diversity at the level of soil order in the state of Illinois (IL) (USA) [6].

| <b>Stocks</b>     |                                                  | <b>Area (2016)</b>      | <b>Area (2016)</b> |
|-------------------|--------------------------------------------------|-------------------------|--------------------|
| <b>Soil Order</b> | <b>General Characteristics and Constraints</b>   | <b>(km<sup>2</sup>)</b> | <b>(%)</b>         |
|                   | <b>Slightly Weathered</b>                        | <b>15,120.1</b>         | <b>12.1</b>        |
| Entisols          | Embryonic soils with ochric epipedon             | 9420.5                  | 7.5                |
| Inceptisols       | Young soils with ochric or umbric epipedon       | 4822.5                  | 3.9                |
| Histosols         | Organic soils with $\geq 20\%$ of organic carbon | 877.0                   | 0.7                |
|                   | <b>Moderately Weathered</b>                      | <b>108,792.1</b>        | <b>87.7</b>        |
| Alfisols          | Clay-enriched B horizon with B.S. $\geq 35\%$    | 55,983.9                | 45.1               |
| Mollisols         | Carbon-enriched soils with B.S. $\geq 50\%$      | 52,808.2                | 42.6               |
|                   | <b>Strongly Weathered</b>                        | <b>190.9</b>            | <b>0.2</b>         |
| Ultisols          | Highly leached soils with B.S. $< 35\%$          | 190.9                   | 0.2                |
| <b>Total</b>      |                                                  | <b>124,103.1</b>        | <b>100%</b>        |

Note: B.S. = base saturation. Entisols, Inceptisols, Alfisols, Mollisols, and Ultisols are mineral soils. Histosols are mostly organic soils.
