# Supplementary material
Source: MDPI journal article supplement (https://www.mdpi.com/2073-445X/12/8/1567)
Supplement: s1 [file s1 › Table S2_overview of the accounting framework.pdf]

**Table S2.** An overview of the accounting framework used by this study (adapted from Groshans et al. (2019) [21]) for the state of Illinois (USA).

| OWNERSHIP (e.g., government, private, foreign, shared, single, etc.) |                                                                                                                                       |                                             |                                                                                      |                     |                                                                                                                 |                                                                                                                                    |
|----------------------------------------------------------------------|---------------------------------------------------------------------------------------------------------------------------------------|---------------------------------------------|--------------------------------------------------------------------------------------|---------------------|-----------------------------------------------------------------------------------------------------------------|------------------------------------------------------------------------------------------------------------------------------------|
| Time<br><br>(e.g., information disclosure, etc.)                     | STOCKS / SOURCE ATTRIBUTION                                                                                                           |                                             | FLOWS / LAND USE, CHANGE                                                             |                     | VALUE                                                                                                           |                                                                                                                                    |
|                                                                      | Biophysical Accounts<br>(Science-Based)                                                                                               | Administrative Accounts<br>(Boundary-Based) | Monetary Account(s)                                                                  | Benefit(s)/ Damages | Total Value                                                                                                     |                                                                                                                                    |
|                                                                      | Soil extent:                                                                                                                          | Administrative extent:                      | Ecosystem good(s) and service(s):                                                    | Sector:             | Types of value (e.g., economic value, etc.):                                                                    |                                                                                                                                    |
|                                                                      | Composite (total) stock: Total soil carbon (TSC) = Soil organic carbon (SOC) + Soil inorganic carbon (SIC)                            |                                             |                                                                                      |                     |                                                                                                                 |                                                                                                                                    |
| Past<br><br>(e.g., post-development disclosures)                     | - Soil orders (Entisols, Inceptisols, Histosols, Alfisols, Mollisols, Ultisols)<br><br>- State (Illinois);<br>- County (102 counties) |                                             | Environment;<br>Soil health                                                          |                     | "Avoided" or "realized" social cost of carbon (SC-CO <sub>2</sub> ) emissions<br><b>(carbon footprint, CF):</b> |                                                                                                                                    |
| Current (e.g., status)                                               |                                                                                                                                       |                                             | - Regulation (e.g., carbon sequestration);<br>- Provisioning (e.g., food production) |                     | - Carbon gain (sequestration);<br>- Carbon loss                                                                 | - \$46 per metric ton of CO <sub>2</sub> applicable for the year 2025 (2007 U.S. dollars with an average discount rate of 3% [19]) |
| Future<br><br>(e.g., pre-development disclosures)                    |                                                                                                                                       |                                             | Conflicts of Interest (COI)                                                          |                     |                                                                                                                 |                                                                                                                                    |
| Soil Health Continuum                                                |                                                                                                                                       |                                             |                                                                                      |                     |                                                                                                                 |                                                                                                                                    |
| Loss and Damage (L&D)                                                |                                                                                                                                       |                                             |                                                                                      |                     |                                                                                                                 |                                                                                                                                    |
| Liability (Responsibility)                                           |                                                                                                                                       |                                             |                                                                                      |                     |                                                                                                                 |                                                                                                                                    |
