# Supplementary material
Source: MDPI journal article supplement (https://www.mdpi.com/2073-445X/12/8/1567)
Supplement: s1 [file s1 › Table S4_Distribution of soil carbon regulating ecosystem services in the state of Illinois (USA) by soil order_rev.pdf]

**Table S4.** Distribution of soil carbon regulating ecosystem services in the state of Illinois (USA) by soil order.

| Parameter                               | 2016 Total           | Degree of Weathering and Soil Development |                      |                      |                      |                      |                   |
|-----------------------------------------|----------------------|-------------------------------------------|----------------------|----------------------|----------------------|----------------------|-------------------|
|                                         |                      | Slight                                    |                      |                      | Moderate             |                      | Strong            |
|                                         |                      | Entisols                                  | Inceptisols          | Histosols            | Alfisols             | Mollisols            | Ultisols          |
| <b>2016 Area (km<sup>2</sup>)</b>       | <b>124,103.1</b>     | <b>9420.5</b>                             | <b>4822.5</b>        | <b>877.0</b>         | <b>55,983.9</b>      | <b>52,808.2</b>      | <b>190.9</b>      |
| <b>Soil organic carbon (SOC):</b>       |                      |                                           |                      |                      |                      |                      |                   |
| Minimum (kg)                            | $5.3 \times 10^{11}$ | $1.7 \times 10^{10}$                      | $1.4 \times 10^{10}$ | $5.6 \times 10^{10}$ | $1.3 \times 10^{11}$ | $3.1 \times 10^{11}$ | $3.6 \times 10^8$ |
| Midpoint (kg)                           | $1.4 \times 10^{12}$ | $7.5 \times 10^{10}$                      | $4.3 \times 10^{10}$ | $1.2 \times 10^{11}$ | $4.2 \times 10^{11}$ | $7.1 \times 10^{11}$ | $1.4 \times 10^9$ |
| Maximum (kg)                            | $2.4 \times 10^{12}$ | $1.5 \times 10^{11}$                      | $8.4 \times 10^{10}$ | $2.1 \times 10^{11}$ | $7.9 \times 10^{11}$ | $1.2 \times 10^{12}$ | $2.7 \times 10^9$ |
| Minimum (SC-CO <sub>2</sub> , \$, USD)  | $8.9 \times 10^{10}$ | $2.8 \times 10^9$                         | $2.3 \times 10^9$    | $9.5 \times 10^9$    | $2.2 \times 10^{10}$ | $5.3 \times 10^{10}$ | $6.1 \times 10^7$ |
| Midpoint (SC-CO <sub>2</sub> , \$, USD) | $2.3 \times 10^{11}$ | $1.3 \times 10^{10}$                      | $7.2 \times 10^9$    | $2.1 \times 10^{10}$ | $7.1 \times 10^{10}$ | $1.2 \times 10^{11}$ | $2.3 \times 10^8$ |
| Maximum (SC-CO <sub>2</sub> , \$, USD)  | $4.1 \times 10^{11}$ | $2.5 \times 10^{10}$                      | $1.4 \times 10^{10}$ | $3.6 \times 10^{10}$ | $1.3 \times 10^{11}$ | $2.0 \times 10^{11}$ | $4.5 \times 10^8$ |
| <b>Soil inorganic carbon (SIC):</b>     |                      |                                           |                      |                      |                      |                      |                   |
| Minimum (kg)                            | $3.6 \times 10^{11}$ | $1.8 \times 10^{10}$                      | $1.2 \times 10^{10}$ | $5.3 \times 10^8$    | $7.3 \times 10^{10}$ | $2.6 \times 10^{11}$ | 0                 |
| Midpoint (kg)                           | $9.2 \times 10^{11}$ | $4.5 \times 10^{10}$                      | $2.5 \times 10^{10}$ | $2.1 \times 10^9$    | $2.4 \times 10^{11}$ | $6.1 \times 10^{11}$ | 0                 |
| Maximum (kg)                            | $1.6 \times 10^{12}$ | $7.9 \times 10^{10}$                      | $4.1 \times 10^{10}$ | $4.4 \times 10^9$    | $4.5 \times 10^{11}$ | $1.0 \times 10^{12}$ | 0                 |
| Minimum (SC-CO <sub>2</sub> , \$, USD)  | $6.1 \times 10^{10}$ | $3.0 \times 10^9$                         | $2.0 \times 10^9$    | $8.8 \times 10^7$    | $1.2 \times 10^{10}$ | $4.4 \times 10^{10}$ | 0                 |
| Midpoint (SC-CO <sub>2</sub> , \$, USD) | $1.5 \times 10^{11}$ | $7.7 \times 10^9$                         | $4.1 \times 10^9$    | $3.6 \times 10^8$    | $4.0 \times 10^{10}$ | $1.0 \times 10^{11}$ | 0                 |
| Maximum (SC-CO <sub>2</sub> , \$, USD)  | $2.7 \times 10^{11}$ | $1.3 \times 10^{10}$                      | $6.8 \times 10^9$    | $7.4 \times 10^8$    | $7.7 \times 10^{10}$ | $1.8 \times 10^{11}$ | 0                 |
| <b>Total soil carbon (TSC):</b>         |                      |                                           |                      |                      |                      |                      |                   |
| Minimum (kg)                            | $8.9 \times 10^{11}$ | $3.5 \times 10^{10}$                      | $2.6 \times 10^{10}$ | $5.7 \times 10^{10}$ | $2.0 \times 10^{11}$ | $5.7 \times 10^{11}$ | $3.6 \times 10^8$ |
| Midpoint (kg)                           | $2.3 \times 10^{12}$ | $1.2 \times 10^{11}$                      | $6.8 \times 10^{10}$ | $1.2 \times 10^{11}$ | $6.6 \times 10^{11}$ | $1.3 \times 10^{12}$ | $1.4 \times 10^9$ |
| Maximum (kg)                            | $4.1 \times 10^{12}$ | $2.3 \times 10^{11}$                      | $1.2 \times 10^{11}$ | $2.2 \times 10^{11}$ | $1.2 \times 10^{12}$ | $2.2 \times 10^{12}$ | $2.7 \times 10^9$ |
| Minimum (SC-CO <sub>2</sub> , \$, USD)  | $1.5 \times 10^{11}$ | $5.8 \times 10^9$                         | $4.3 \times 10^9$    | $9.5 \times 10^9$    | $3.4 \times 10^{10}$ | $9.6 \times 10^{10}$ | $6.1 \times 10^7$ |
| Midpoint (SC-CO <sub>2</sub> , \$, USD) | $3.9 \times 10^{11}$ | $2.0 \times 10^{10}$                      | $1.1 \times 10^{10}$ | $2.1 \times 10^{10}$ | $1.1 \times 10^{11}$ | $2.2 \times 10^{11}$ | $2.3 \times 10^8$ |
| Maximum (SC-CO <sub>2</sub> , \$, USD)  | $6.8 \times 10^{11}$ | $3.8 \times 10^{10}$                      | $2.1 \times 10^{10}$ | $3.7 \times 10^{10}$ | $2.1 \times 10^{11}$ | $3.8 \times 10^{11}$ | $4.5 \times 10^8$ |
