# Supplementary material
Source: MDPI journal article supplement (https://www.mdpi.com/2073-445X/12/8/1567)
Supplement: s1 [file s1 › Table S5_Increases in developed land and potential for realized social costs of carbon (C) in the state of Illinois.pdf]

**Table S5.** Increases in developed land and potential for realized social costs of carbon (C) due to complete loss of total soil carbon (TSC) of developed land by soil order in the state of Illinois (USA) from 2001 to 2016.

| Parameter                                           | Total                | Degree of Weathering and Soil Development |                   |                   |                   |                      |          |
|-----------------------------------------------------|----------------------|-------------------------------------------|-------------------|-------------------|-------------------|----------------------|----------|
|                                                     |                      | Slight                                    |                   |                   | Moderate          |                      | Strong   |
|                                                     |                      | Entisols                                  | Inceptisols       | Histosols         | Alfisols          | Mollisols            | Ultisols |
| <b>Developed, open space (km<sup>2</sup>)</b>       | 203.5                | 9.6                                       | 1.4               | 6.4               | 74.7              | 111.3                | 0.0      |
| <b>Total soil carbon (TSC):</b>                     |                      |                                           |                   |                   |                   |                      |          |
| Minimum (kg)                                        | $1.9 \times 10^9$    | $3.6 \times 10^7$                         | $7.4 \times 10^6$ | $4.1 \times 10^8$ | $2.7 \times 10^8$ | $1.2 \times 10^9$    | 0.0      |
| Midpoint (kg)                                       | $4.7 \times 10^9$    | $1.2 \times 10^8$                         | $2.0 \times 10^7$ | $9.1 \times 10^8$ | $8.8 \times 10^8$ | $2.8 \times 10^9$    | 0.0      |
| Maximum (kg)                                        | $8.2 \times 10^9$    | $2.3 \times 10^8$                         | $3.6 \times 10^7$ | $1.6 \times 10^9$ | $1.7 \times 10^9$ | $4.7 \times 10^9$    | 0.0      |
| Minimum (SC-CO <sub>2</sub> , \$, USD)              | $3.2 \times 10^8$    | $6.0 \times 10^6$                         | $1.2 \times 10^6$ | $7.0 \times 10^7$ | $4.6 \times 10^7$ | $2.0 \times 10^8$    | 0.0      |
| Midpoint (SC-CO <sub>2</sub> , \$, USD)             | $8.0 \times 10^8$    | $2.1 \times 10^7$                         | $3.3 \times 10^6$ | $1.5 \times 10^8$ | $1.5 \times 10^8$ | $4.7 \times 10^8$    | 0.0      |
| Maximum (SC-CO <sub>2</sub> , \$, USD)              | $1.4 \times 10^9$    | $3.9 \times 10^7$                         | $6.1 \times 10^6$ | $2.7 \times 10^8$ | $2.8 \times 10^8$ | $8.0 \times 10^8$    | 0.0      |
| <b>Developed, medium intensity (km<sup>2</sup>)</b> | 206.0                | 24.3                                      | 1.0               | 2.5               | 61.6              | 116.5                | 0.0      |
| <b>Total soil carbon (TSC):</b>                     |                      |                                           |                   |                   |                   |                      |          |
| Minimum (kg)                                        | $1.7 \times 10^9$    | $9.0 \times 10^7$                         | $5.3 \times 10^6$ | $1.6 \times 10^8$ | $2.2 \times 10^8$ | $1.3 \times 10^9$    | 0.0      |
| Midpoint (kg)                                       | $4.3 \times 10^9$    | $3.1 \times 10^8$                         | $1.4 \times 10^7$ | $3.6 \times 10^8$ | $7.3 \times 10^8$ | $2.9 \times 10^9$    | 0.0      |
| Maximum (kg)                                        | $7.6 \times 10^9$    | $5.9 \times 10^8$                         | $2.6 \times 10^7$ | $6.2 \times 10^8$ | $1.4 \times 10^9$ | $5.0 \times 10^9$    | 0.0      |
| Minimum (SC-CO <sub>2</sub> , \$, USD)              | $2.9 \times 10^8$    | $1.5 \times 10^7$                         | $8.9 \times 10^5$ | $2.7 \times 10^7$ | $3.8 \times 10^7$ | $2.1 \times 10^8$    | 0.0      |
| Midpoint (SC-CO <sub>2</sub> , \$, USD)             | $7.3 \times 10^8$    | $5.3 \times 10^7$                         | $2.4 \times 10^6$ | $6.0 \times 10^7$ | $1.2 \times 10^8$ | $4.9 \times 10^8$    | 0.0      |
| Maximum (SC-CO <sub>2</sub> , \$, USD)              | $1.3 \times 10^9$    | $9.9 \times 10^7$                         | $4.4 \times 10^6$ | $1.0 \times 10^8$ | $2.3 \times 10^8$ | $8.4 \times 10^8$    | 0.0      |
| <b>Developed, low intensity (km<sup>2</sup>)</b>    | 195.9                | 1.8                                       | 0.8               | 3.9               | 65.3              | 124.1                | 0.0      |
| <b>Total soil carbon (TSC):</b>                     |                      |                                           |                   |                   |                   |                      |          |
| Minimum (kg)                                        | $1.8 \times 10^9$    | $6.7 \times 10^6$                         | $4.2 \times 10^6$ | $2.5 \times 10^8$ | $2.4 \times 10^8$ | $1.3 \times 10^9$    | 0.0      |
| Midpoint (kg)                                       | $4.5 \times 10^9$    | $2.3 \times 10^7$                         | $1.1 \times 10^7$ | $5.6 \times 10^8$ | $7.7 \times 10^8$ | $3.1 \times 10^9$    | 0.0      |
| Maximum (kg)                                        | $7.8 \times 10^9$    | $4.4 \times 10^7$                         | $2.1 \times 10^7$ | $9.7 \times 10^8$ | $1.4 \times 10^9$ | $5.3 \times 10^9$    | 0.0      |
| Minimum (SC-CO <sub>2</sub> , \$, USD)              | $3.1 \times 10^8$    | $1.1 \times 10^6$                         | $7.1 \times 10^5$ | $4.2 \times 10^7$ | $4.0 \times 10^7$ | $2.3 \times 10^8$    | 0.0      |
| Midpoint (SC-CO <sub>2</sub> , \$, USD)             | $7.5 \times 10^8$    | $3.9 \times 10^6$                         | $1.9 \times 10^6$ | $9.4 \times 10^7$ | $1.3 \times 10^8$ | $5.2 \times 10^8$    | 0.0      |
| Maximum (SC-CO <sub>2</sub> , \$, USD)              | $1.3 \times 10^9$    | $7.3 \times 10^6$                         | $3.5 \times 10^6$ | $1.6 \times 10^8$ | $2.4 \times 10^8$ | $8.9 \times 10^8$    | 0.0      |
| <b>Developed, high intensity (km<sup>2</sup>)</b>   | 116.5                | 21.6                                      | 0.3               | 1.3               | 26.9              | 66.3                 | 0.0      |
| <b>Total soil carbon (TSC):</b>                     |                      |                                           |                   |                   |                   |                      |          |
| Minimum (kg)                                        | $9.8 \times 10^8$    | $8.0 \times 10^7$                         | $1.6 \times 10^6$ | $8.4 \times 10^7$ | $9.7 \times 10^7$ | $7.2 \times 10^8$    | 0.0      |
| Midpoint (kg)                                       | $2.4 \times 10^9$    | $2.8 \times 10^8$                         | $4.2 \times 10^6$ | $1.9 \times 10^8$ | $3.2 \times 10^8$ | $1.7 \times 10^9$    | 0.0      |
| Maximum (kg)                                        | $4.3 \times 10^9$    | $5.2 \times 10^8$                         | $7.7 \times 10^6$ | $3.2 \times 10^8$ | $6.0 \times 10^8$ | $2.8 \times 10^9$    | 0.0      |
| Minimum (SC-CO <sub>2</sub> , \$, USD)              | $1.6 \times 10^8$    | $1.3 \times 10^7$                         | $2.7 \times 10^5$ | $1.4 \times 10^7$ | $1.6 \times 10^7$ | $1.2 \times 10^8$    | 0.0      |
| Midpoint (SC-CO <sub>2</sub> , \$, USD)             | $4.1 \times 10^8$    | $4.7 \times 10^7$                         | $7.1 \times 10^5$ | $3.1 \times 10^7$ | $5.4 \times 10^7$ | $2.8 \times 10^8$    | 0.0      |
| Maximum (SC-CO <sub>2</sub> , \$, USD)              | $7.2 \times 10^8$    | $8.8 \times 10^7$                         | $1.3 \times 10^6$ | $5.5 \times 10^7$ | $1.0 \times 10^8$ | $4.8 \times 10^8$    | 0.0      |
| <b>Total area (km<sup>2</sup>)</b>                  | 721.8                | 57.4                                      | 3.6               | 14.0              | 228.6             | 418.3                | 0.0      |
| <b>Total soil carbon (TSC):</b>                     |                      |                                           |                   |                   |                   |                      |          |
| Minimum (kg)                                        | $6.5 \times 10^9$    | $2.1 \times 10^8$                         | $1.9 \times 10^7$ | $9.0 \times 10^8$ | $8.2 \times 10^8$ | $4.5 \times 10^9$    | 0.0      |
| Midpoint (kg)                                       | $1.6 \times 10^{10}$ | $7.3 \times 10^8$                         | $5.0 \times 10^7$ | $2.0 \times 10^9$ | $2.7 \times 10^9$ | $1.0 \times 10^{10}$ | 0.0      |
| Maximum (kg)                                        | $2.8 \times 10^{10}$ | $1.4 \times 10^9$                         | $9.3 \times 10^7$ | $3.5 \times 10^9$ | $5.1 \times 10^9$ | $1.8 \times 10^{10}$ | 0.0      |
| Minimum (SC-CO <sub>2</sub> , \$, USD)              | $1.1 \times 10^9$    | $3.6 \times 10^7$                         | $3.2 \times 10^6$ | $1.5 \times 10^8$ | $1.4 \times 10^8$ | $7.6 \times 10^8$    | 0.0      |
| Midpoint (SC-CO <sub>2</sub> , \$, USD)             | $2.7 \times 10^9$    | $1.2 \times 10^8$                         | $8.5 \times 10^6$ | $3.4 \times 10^8$ | $4.5 \times 10^8$ | $1.8 \times 10^9$    | 0.0      |
| Maximum (SC-CO <sub>2</sub> , \$, USD)              | $4.7 \times 10^9$    | $2.3 \times 10^8$                         | $1.6 \times 10^7$ | $5.9 \times 10^8$ | $8.5 \times 10^8$ | $3.0 \times 10^9$    | 0.0      |
