# Supplementary material
Source: MDPI journal article supplement (https://www.mdpi.com/2073-445X/12/8/1567)
Supplement: s1 [file s1 › Table S6_Developed land and potential for realized social costs of carbon (C)_IL.pdf]

**Table S6.** Developed land and potential for realized social costs of carbon (C) due to complete loss of total soil carbon (TSC) of developed land by soil order in the state of Illinois (USA) prior and through 2016.

| Parameter                                           | Total                | Degree of Weathering and Soil Development |                   |                      |                      |                      |                   |
|-----------------------------------------------------|----------------------|-------------------------------------------|-------------------|----------------------|----------------------|----------------------|-------------------|
|                                                     |                      | Slight                                    |                   |                      | Moderate             |                      | Strong            |
|                                                     |                      | Entisols                                  | Inceptisols       | Histosols            | Alfisols             | Mollisols            | Ultisols          |
| <b>Developed, open space (km<sup>2</sup>)</b>       | 5091.8               | 388.3                                     | 130.2             | 53.2                 | 2564.1               | 1953.2               | 2.7               |
| <b>Total soil carbon (TSC):</b>                     |                      |                                           |                   |                      |                      |                      |                   |
| Minimum (kg)                                        | $3.6 \times 10^{10}$ | $1.4 \times 10^9$                         | $6.9 \times 10^8$ | $3.4 \times 10^9$    | $9.2 \times 10^9$    | $2.1 \times 10^{10}$ | $5.2 \times 10^6$ |
| Midpoint (kg)                                       | $9.3 \times 10^{10}$ | $5.0 \times 10^9$                         | $1.8 \times 10^9$ | $7.6 \times 10^9$    | $3.0 \times 10^{10}$ | $4.9 \times 10^{10}$ | $1.9 \times 10^7$ |
| Maximum (kg)                                        | $1.7 \times 10^{11}$ | $9.4 \times 10^9$                         | $3.4 \times 10^9$ | $1.3 \times 10^{10}$ | $5.7 \times 10^{10}$ | $8.3 \times 10^{10}$ | $3.8 \times 10^7$ |
| Minimum (SC-CO <sub>2</sub> , \$, USD)              | $6.1 \times 10^9$    | $2.4 \times 10^8$                         | $1.2 \times 10^8$ | $5.8 \times 10^8$    | $1.6 \times 10^9$    | $3.6 \times 10^9$    | $8.7 \times 10^5$ |
| Midpoint (SC-CO <sub>2</sub> , \$, USD)             | $1.6 \times 10^{10}$ | $8.4 \times 10^8$                         | $3.1 \times 10^8$ | $1.3 \times 10^9$    | $5.1 \times 10^9$    | $8.2 \times 10^9$    | $3.3 \times 10^6$ |
| Maximum (SC-CO <sub>2</sub> , \$, USD)              | $2.8 \times 10^{10}$ | $1.6 \times 10^9$                         | $5.7 \times 10^8$ | $2.2 \times 10^9$    | $9.6 \times 10^9$    | $1.4 \times 10^{10}$ | $6.4 \times 10^6$ |
| <b>Developed, medium intensity (km<sup>2</sup>)</b> | 2031.7               | 668.2                                     | 9.9               | 15.4                 | 524.7                | 813.5                | 0.0               |
| <b>Total soil carbon (TSC):</b>                     |                      |                                           |                   |                      |                      |                      |                   |
| Minimum (kg)                                        | $1.4 \times 10^{10}$ | $2.5 \times 10^9$                         | $5.3 \times 10^7$ | $9.9 \times 10^8$    | $1.9 \times 10^9$    | $8.8 \times 10^9$    | $1.5 \times 10^4$ |
| Midpoint (kg)                                       | $3.7 \times 10^{10}$ | $8.6 \times 10^9$                         | $1.4 \times 10^8$ | $2.2 \times 10^9$    | $6.2 \times 10^9$    | $2.0 \times 10^{10}$ | $5.8 \times 10^4$ |
| Maximum (kg)                                        | $6.6 \times 10^{10}$ | $1.6 \times 10^{10}$                      | $2.6 \times 10^8$ | $3.8 \times 10^9$    | $1.2 \times 10^{10}$ | $3.5 \times 10^{10}$ | $1.1 \times 10^5$ |
| Minimum (SC-CO <sub>2</sub> , \$, USD)              | $2.4 \times 10^9$    | $4.1 \times 10^8$                         | $8.9 \times 10^6$ | $1.7 \times 10^8$    | $3.2 \times 10^8$    | $1.5 \times 10^9$    | $2.6 \times 10^3$ |
| Midpoint (SC-CO <sub>2</sub> , \$, USD)             | $6.3 \times 10^9$    | $1.4 \times 10^9$                         | $2.3 \times 10^7$ | $3.7 \times 10^8$    | $1.0 \times 10^9$    | $3.4 \times 10^9$    | $9.7 \times 10^3$ |
| Maximum (SC-CO <sub>2</sub> , \$, USD)              | $1.1 \times 10^{10}$ | $2.7 \times 10^9$                         | $4.3 \times 10^7$ | $6.5 \times 10^8$    | $2.0 \times 10^9$    | $5.8 \times 10^9$    | $1.9 \times 10^4$ |
| <b>Developed, low intensity (km<sup>2</sup>)</b>    | 5422.9               | 752.0                                     | 62.6              | 49.6                 | 2182.3               | 2376.2               | 0.2               |
| <b>Total soil carbon (TSC):</b>                     |                      |                                           |                   |                      |                      |                      |                   |
| Minimum (kg)                                        | $4.0 \times 10^{10}$ | $2.8 \times 10^9$                         | $3.3 \times 10^8$ | $3.2 \times 10^9$    | $7.9 \times 10^9$    | $2.6 \times 10^{10}$ | $3.2 \times 10^5$ |
| Midpoint (kg)                                       | $1.0 \times 10^{11}$ | $9.6 \times 10^9$                         | $8.8 \times 10^8$ | $7.1 \times 10^9$    | $2.6 \times 10^{10}$ | $5.9 \times 10^{10}$ | $1.2 \times 10^6$ |
| Maximum (kg)                                        | $1.8 \times 10^{11}$ | $1.8 \times 10^{10}$                      | $1.6 \times 10^9$ | $1.2 \times 10^{10}$ | $4.8 \times 10^{10}$ | $1.0 \times 10^{11}$ | $2.3 \times 10^6$ |
| Minimum (SC-CO <sub>2</sub> , \$, USD)              | $6.7 \times 10^9$    | $4.7 \times 10^8$                         | $5.6 \times 10^7$ | $5.4 \times 10^8$    | $1.3 \times 10^9$    | $4.3 \times 10^9$    | $5.3 \times 10^4$ |
| Midpoint (SC-CO <sub>2</sub> , \$, USD)             | $1.7 \times 10^{10}$ | $1.6 \times 10^9$                         | $1.5 \times 10^8$ | $1.2 \times 10^9$    | $4.3 \times 10^9$    | $1.0 \times 10^{10}$ | $2.0 \times 10^5$ |
| Maximum (SC-CO <sub>2</sub> , \$, USD)              | $3.1 \times 10^{10}$ | $3.1 \times 10^9$                         | $2.7 \times 10^8$ | $2.1 \times 10^9$    | $8.2 \times 10^9$    | $1.7 \times 10^{10}$ | $3.9 \times 10^5$ |
| <b>Developed, high intensity (km<sup>2</sup>)</b>   | 814.6                | 431.1                                     | 1.5               | 6.8                  | 120.4                | 254.8                | 0.0               |
| <b>Total soil carbon (TSC):</b>                     |                      |                                           |                   |                      |                      |                      |                   |
| Minimum (kg)                                        | $5.2 \times 10^9$    | $1.6 \times 10^9$                         | $7.9 \times 10^6$ | $4.4 \times 10^8$    | $4.3 \times 10^8$    | $2.8 \times 10^9$    | $3.4 \times 10^3$ |
| Midpoint (kg)                                       | $1.4 \times 10^{10}$ | $5.5 \times 10^9$                         | $2.1 \times 10^7$ | $9.7 \times 10^8$    | $1.4 \times 10^9$    | $6.4 \times 10^9$    | $1.3 \times 10^4$ |
| Maximum (kg)                                        | $2.6 \times 10^{10}$ | $1.0 \times 10^{10}$                      | $3.9 \times 10^7$ | $1.7 \times 10^9$    | $2.7 \times 10^9$    | $1.1 \times 10^{10}$ | $2.5 \times 10^4$ |
| Minimum (SC-CO <sub>2</sub> , \$, USD)              | $8.8 \times 10^8$    | $2.7 \times 10^8$                         | $1.3 \times 10^6$ | $7.4 \times 10^7$    | $7.3 \times 10^7$    | $4.6 \times 10^8$    | $5.8 \times 10^2$ |
| Midpoint (SC-CO <sub>2</sub> , \$, USD)             | $2.4 \times 10^9$    | $9.4 \times 10^8$                         | $3.5 \times 10^6$ | $1.6 \times 10^8$    | $2.4 \times 10^8$    | $1.1 \times 10^9$    | $2.2 \times 10^3$ |
| Maximum (SC-CO <sub>2</sub> , \$, USD)              | $4.3 \times 10^9$    | $1.8 \times 10^9$                         | $6.5 \times 10^6$ | $2.8 \times 10^8$    | $4.5 \times 10^8$    | $1.8 \times 10^9$    | $4.2 \times 10^3$ |
| <b>Total area (km<sup>2</sup>)</b>                  | 13,361.0             | 2239.6                                    | 204.3             | 125.0                | 5391.5               | 5397.7               | 2.9               |
| <b>Total soil carbon (TSC):</b>                     |                      |                                           |                   |                      |                      |                      |                   |
| Minimum (kg)                                        | $9.5 \times 10^{10}$ | $8.3 \times 10^9$                         | $1.1 \times 10^9$ | $8.1 \times 10^9$    | $1.9 \times 10^{10}$ | $5.8 \times 10^{10}$ | $5.5 \times 10^6$ |
| Midpoint (kg)                                       | $2.5 \times 10^{11}$ | $2.9 \times 10^{10}$                      | $2.9 \times 10^9$ | $1.8 \times 10^{10}$ | $6.4 \times 10^{10}$ | $1.3 \times 10^{11}$ | $2.1 \times 10^7$ |
| Maximum (kg)                                        | $4.4 \times 10^{11}$ | $5.4 \times 10^{10}$                      | $5.3 \times 10^9$ | $3.1 \times 10^{10}$ | $1.2 \times 10^{11}$ | $2.3 \times 10^{11}$ | $4.0 \times 10^7$ |
| Minimum (SC-CO <sub>2</sub> , \$, USD)              | $1.6 \times 10^{10}$ | $1.4 \times 10^9$                         | $1.8 \times 10^8$ | $1.4 \times 10^9$    | $3.3 \times 10^9$    | $9.8 \times 10^9$    | $9.3 \times 10^5$ |
| Midpoint (SC-CO <sub>2</sub> , \$, USD)             | $4.2 \times 10^{10}$ | $4.9 \times 10^9$                         | $4.8 \times 10^8$ | $3.0 \times 10^9$    | $1.1 \times 10^{10}$ | $2.3 \times 10^{10}$ | $3.5 \times 10^6$ |
| Maximum (SC-CO <sub>2</sub> , \$, USD)              | $7.4 \times 10^{10}$ | $9.1 \times 10^9$                         | $8.9 \times 10^8$ | $5.2 \times 10^9$    | $2.0 \times 10^{10}$ | $3.9 \times 10^{10}$ | $6.8 \times 10^6$ |
